# Supplementary material
Source: HighWire-hosted journal article supplement (https://www.cmaj.ca/highwire/filestream/69269/field_highwire_adjunct_files/0/170253-five-1-at.pdf)
Supplement: 170253-five-1-at.pdf [file 170253-five-1-at.pdf]

## Appendix 1 (as supplied by the authors): Hepatopulmonary syndrome versus portopulmonary hypertension

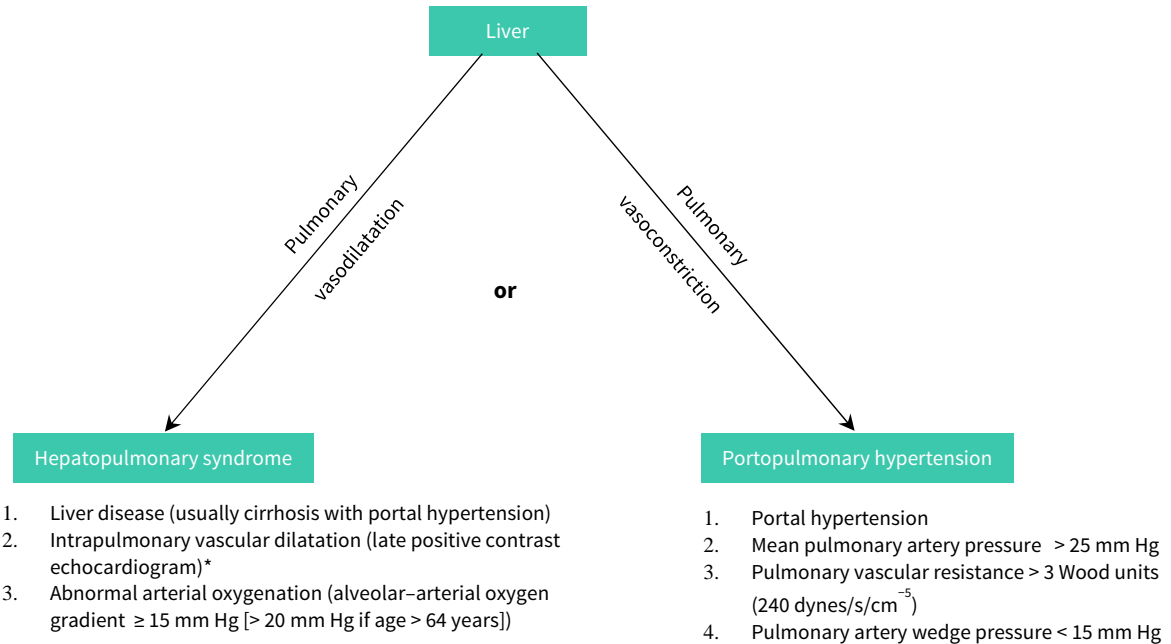

Figure: Liver disease can result in two “opposite” phenotypes: hepatopulmonary syndrome or portopulmonary hypertension. \*Microbubbles in the left heart  $\geq 3$  cardiac cycles after microbubbles in right heart, following injection of 10 mL of agitated saline into a peripheral arm vein. Intrapulmonary vascular dilatation can also be diagnosed and quantified through a radioisotope macroaggregated albumin shunt scan, in the absence of an intracardiac shunt.<sup>1</sup>

### Reference:

1. Krowka MJ, Fallon MB, Kawut SM, et al. International Liver Transplant Society practice guidelines: diagnosis and management of hepatopulmonary syndrome and portopulmonary hypertension. *Transplantation* 2016;100:1440-52.
